# Supplementary material
Source: publisher figshare collection journal article supplement (https://gsapubs.figshare.com/ndownloader/files/22747586)
Supplement: Supplementary file 1 [file 22747586]

## GSA Data Repository 2010008

Using meteoric  $^{10}\text{Be}$  to track fluvial sand through the  
Waipaoa River Basin, New Zealand

L. Reusser and P. Bierman

---

### Sample preparation and measurement:

Upon arrival at the University of Vermont, we thoroughly dried each sample, then milled a well mixed ~20g aliquot in a SPEX Centriprep 8500 Shatterbox to a fine powder. We further prepared samples in three separate cosmogenic isotope laboratories located at the University of Vermont in Burlington, VT, the University of Washington in Seattle, WA, and Hebrew University in Jerusalem, IS. Meteoric  $^{10}\text{Be}$  was isolated from a ~0.75 g aliquot through the rapid fusion method presented in Stone (1998), precipitated as a hydroxide, burned to produce BeO, packed into cathodes mixed with Nb power, and measured at the Center for Accelerator Mass Spectrometry (CAMS), Lawrence Livermore National Laboratory. We normalized measured ratios of  $^{10}\text{Be}/^9\text{Be}$  to the 07KNSTD3110 standard (Nishiizumi *et al.*, 2007) to arrive at our final  $^{10}\text{Be}$  concentrations.

### Process and temporal replication:

We calculate the percent difference between process and temporal replicates by dividing the absolute difference between  $^{10}\text{Be}$  concentrations of the two analyses by the average of the two analyses.

### Mid-basin mixing model:

In order to quantify the proportion of sediment originating in the upper basin, which contains nearly all of the gully complexes in the Waipaoa system, versus the more stable eastern and western tributaries, we generated a simple mixing model using meteoric  $^{10}\text{Be}$  concentrations:

$$[N_{up}][m_{up}] + [N_{trib}][m_{trib}] = [N_{down}][m_{up} + m_{trib}]$$

and

$$[m_{up}] + [m_{trib}] = 100 \%$$

where  $[N_{up}]$  is the meteoric  $^{10}\text{Be}$  concentration measured in WA3met, upstream of the confluence of the eastern and western tributaries,  $[N_{trib}]$  is the average meteoric  $^{10}\text{Be}$  concentration measured in sediment from the eastern and western tributaries (WA15met

and WA2/23met),  $[N_{down}]$  is the average  $^{10}\text{Be}$  concentration measured in WA1/21met, downstream of the confluence of the tributaries,  $[m_{up}]$  is the percent of total mass delivered from upstream,  $[m_{trib}]$  is the percent of total mass contributed by the two incoming tributaries, and  $[m_{up} + m_{trib}]$  is the total mass at the downstream mainstem sample site. Refer to Fig. DR-1 and Table DR-1 for sample locations and concentrations.

The model suggests that, at this prominent tributary confluence, ~95% of the sediment originates upstream, from the gully-impacted landscape. Because the area upstream of the confluence ( $765 \text{ km}^2$ ) and the area represented by the incoming tributaries ( $717 \text{ km}^2$ ) are roughly equal, this suggests that the northern Waipaoa basin is producing sediment at a proportional rate approximately 20 times greater relative to the more stable eastern and western tributaries.

In Table DR-1, note that for this mixing scenario, the combined areas of WA3met, WA15met and WA2/23met ( $1482 \text{ km}^2$ ) do not exactly match the “mixed” area at WA1/21met ( $1560 \text{ km}^2$ ). This discrepancy is due to the fact that we collected samples a sufficient distance from the actual confluence in order to ensure that no backwater mixing of sediment occurred during extreme discharge events.

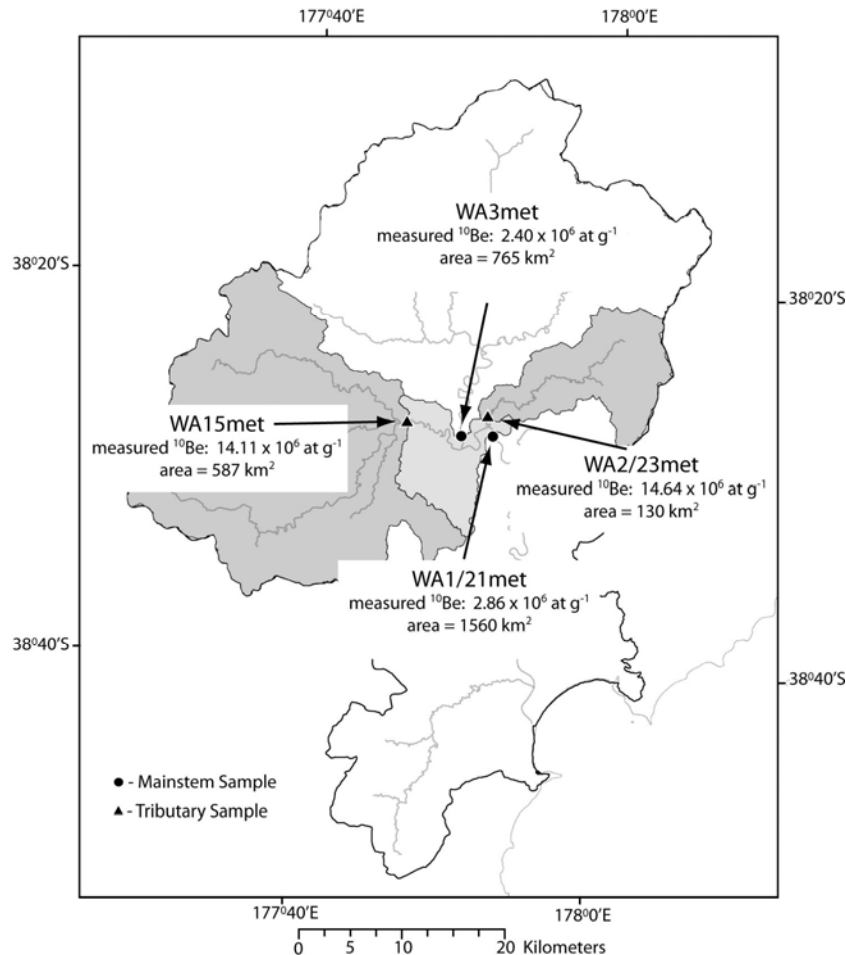

**Figure DR-1:** Map depicts the four samples used in the mixing model used to determine proportionally how much sediment originates in the northern headwater regions of the Waipaoa basin, vs. the eastern and western regions of the basin.

Table DR-1. Summary information for all samples

| Sample ID*     | Collection Date | Type†     | Basin       | Dominant Lithologies‡ | Basin Area (km <sup>2</sup> ) | Area After Mix (km <sup>2</sup> )# | Gully-prone Area (km <sup>2</sup> )** | Percent Area | Eastings†† | Northings†† | <sup>10</sup> Be (at/g x 10 <sup>6</sup> )§§ | Percent Analytic Error (±) | Laboratory Percent Difference | Temporal Percent Difference |
|----------------|-----------------|-----------|-------------|-----------------------|-------------------------------|------------------------------------|---------------------------------------|--------------|------------|-------------|----------------------------------------------|----------------------------|-------------------------------|-----------------------------|
| wa55metis      | March 2005      | Mainstem  | Waipaoa     | Mix                   | 135                           | -                                  | 62.7                                  | 46.6         | 2934482    | 6313167     | 1.68 ± 0.07                                  | 4.1                        | -                             | -                           |
| wa17metis      | March 2005      | Mainstem  | Waipaoa     | Mix                   | 215                           | -                                  | 66.3                                  | 30.8         | 2932852    | 6307866     | 1.66 ± 0.07                                  | 4.4                        | -                             | -                           |
| wa8metis       | May 2004        | Mainstem  | Waipaoa     | Mix                   | 237                           | -                                  | 66.3                                  | 28.0         | 2931309    | 6303207     | 1.52 ± 0.07                                  | 4.4                        | -                             | -                           |
| wa19metis      | March 2005      | Mainstem  | Waipaoa     | Mix                   | 237                           | -                                  | 66.3                                  | 28.0         | 2931320    | 6303196     | 1.44 ± 0.06                                  | 4.1                        | -                             | -                           |
| wa819met_ave## | na              | Mainstem  | Waipaoa     | Mix                   | 237                           | -                                  | 66.3                                  | 28.0         | 2931315    | 6303202     | 1.48 ± 0.06                                  | 4.2                        | -                             | 2.7                         |
| wa7metis       | May 2004        | Mainstem  | Waipaoa     | Mix                   | 476                           | -                                  | 92.6                                  | 19.5         | 2933052    | 6302712     | 2.31 ± 0.08                                  | 3.5                        | -                             | -                           |
| wa14metis      | May 2004        | Mainstem  | Waipaoa     | Mix                   | 692                           | -                                  | 119.4                                 | 17.2         | 2933907    | 6299582     | 2.40 ± 0.08                                  | 3.5                        | -                             | -                           |
| wa3metis       | May 2004        | Mainstem  | Waipaoa     | Mix                   | 765                           | -                                  | 125.2                                 | 16.4         | 2932576    | 6292861     | 2.40 ± 0.09                                  | 3.6                        | -                             | -                           |
| wa4metis       | May 2004        | Mainstem  | Waipaoa     | Mix                   | 1422                          | -                                  | 133.3                                 | 9.4          | 2934089    | 6292248     | 2.77 ± 0.09                                  | 3.4                        | -                             | -                           |
| wa1metis       | May 2004        | Mainstem  | Waipaoa     | Mix                   | 1560                          | -                                  | 133.3                                 | 8.5          | 2935404    | 6293113     | 2.89 ± 0.10                                  | 3.4                        | -                             | -                           |
| wa21metis      | March 2005      | Mainstem  | Waipaoa     | Mix                   | 1560                          | -                                  | 133.3                                 | 8.5          | 2935397    | 6293012     | 2.83 ± 0.10                                  | 3.4                        | -                             | -                           |
| wa121met_ave   | na              | Mainstem  | Waipaoa     | Mix                   | 1560                          | -                                  | 133.3                                 | 8.5          | 2935401    | 6293063     | 2.86 ± 0.10                                  | 3.4                        | -                             | 1.2                         |
| wa11metuw      | May 2004        | Mainstem  | Waipaoa     | Mix                   | 1682                          | -                                  | 133.3                                 | 7.9          | 2937417    | 6286506     | 3.43 ± 0.11                                  | 3.1                        | -                             | -                           |
| wa10metis      | May 2004        | Mainstem  | Waipaoa     | Mix                   | 1777                          | -                                  | 133.3                                 | 7.5          | 2937490    | 6275886     | 3.53 ± 0.13                                  | 3.8                        | -                             | -                           |
| wa53metuw      | March 2005      | Prom Trib | Tikihore    | Gullied ss            | 18                            | 18                                 | 14                                    | 79.1         | 2935834    | 6320513     | 5.65 ± 0.17                                  | 3.1                        | -                             | -                           |
| wa54metis      | March 2005      | Prom Trib | Waimatau    | Gullied ss            | 15                            | 33                                 | 11.7                                  | 76.0         | 2938264    | 6322674     | 3.28 ± 0.10                                  | 3.0                        | -                             | -                           |
| wa54metvt      | March 2005      | Prom Trib | Waimatau    | Gullied ss            | 15                            | 33                                 | 11.7                                  | 76.0         | 2938264    | 6322674     | 3.14 ± 0.18                                  | 5.8                        | -                             | -                           |
| wa54met_ave    | March 2005      | Prom Trib | Waimatau    | Gullied ss            | 15                            | 33                                 | 11.7                                  | 76.0         | 2938264    | 6322674     | 3.21 ± 0.14                                  | 4.4                        | 2.2                           | -                           |
| wa52metuw      | March 2005      | Prom Trib | Te Werarua  | Gullied ms            | 29                            | 62                                 | 12.6                                  | 43.2         | 2934448    | 6315280     | 1.62 ± 0.05                                  | 3.3                        | -                             | -                           |
| wa67metis      | March 2005      | Prom Trib | Mongourongo | Gullied ms, ss, mel   | 38                            | 100                                | 1.1                                   | 2.9          | 2935332    | 6312973     | 1.86 ± 0.07                                  | 3.6                        | -                             | -                           |
| wa9metis       | May 2004        | Prom Trib | Mangatu     | Gullied ms, lm        | 220                           | 451                                | 26.4                                  | 12.0         | 2931396    | 6302380     | 3.34 ± 0.14                                  | 4.1                        | -                             | -                           |
| wa6metis       | May 2004        | Prom Trib | Wainaromia  | Gullied ms            | 194                           | 667                                | 26.9                                  | 13.9         | 2934984    | 6301871     | 2.51 ± 0.09                                  | 3.7                        | -                             | -                           |
| wa15metuw      | May 2004        | Prom Trib | Waikohu     | Ungullied ms, ss      | 587                           | 1397                               | 7.4                                   | 1.3          | 2927098    | 6294320     | 14.72 ± 0.45                                 | 3.0                        | -                             | -                           |
| wa15metvt      | May 2004        | Prom Trib | Waikohu     | Ungullied ms, ss      | 587                           | 1397                               | 7.4                                   | 1.3          | 2927098    | 6294320     | 13.50 ± 0.45                                 | 3.3                        | -                             | -                           |
| wa15met_ave    | May 2004        | Prom Trib | Waikohu     | Ungullied ms, ss      | 587                           | 1397                               | 7.4                                   | 1.3          | 2927098    | 6294320     | 14.11 ± 0.45                                 | 3.2                        | 4.3                           | -                           |
| wa2metuw       | May 2004        | Prom Trib | Waihora     | Ungullied ms          | 130                           | 1535                               | 0                                     | 0.0          | 2935145    | 6294576     | 12.01 ± 0.37                                 | 3.1                        | -                             | -                           |
| wa2metvt       | May 2004        | Prom Trib | Waihora     | Ungullied ms          | 130                           | 1535                               | 0                                     | 0.0          | 2935145    | 6294576     | 11.70 ± 0.37                                 | 3.2                        | -                             | -                           |
| wa2met_ave     | May 2004        | Prom Trib | Waihora     | Ungullied ms          | 130                           | 1535                               | 0                                     | 0.0          | 2935145    | 6294576     | 11.85 ± 0.37                                 | 3.1                        | 1.3                           | -                           |
| wa23metis      | March 2005      | Prom Trib | Waihora     | Ungullied ms          | 130                           | 1535                               | 0                                     | 0.0          | 2935145    | 6294576     | 17.43 ± 0.56                                 | 3.2                        | -                             | -                           |
| wa223met_ave   | na              | Prom Trib | Waihora     | Ungullied ms          | 130                           | 1535                               | 0                                     | 0.0          | 2935145    | 6294576     | 14.64 ± 0.46                                 | 3.2                        | -                             | 19.1                        |

\* The last two letters on sample IDs indicate the lab in which they were prepared; vt = University of Vermont, uw = University of Washington, and is = Hebrew University.

† Mainstem = samples collected along the mainstem Waipaoa channel. Prom trib = samples collected from prominent tributaries mixing into the mainstem Waipaoa channel.

‡ Lithology abbreviations are as follows: ss = sandstone, ms = mudstone, lm = limestone, and mel = melange.

# Area after mix is the total basin area after a given tributary has mixed with the mainstem channel.

\*\* Gully-prone areas were calculated in ArcGIS® using the East Cape Terrain Geographic coverage (Team, 1994).

†† All coordinates are listed in NZ Grid, 1949.

§§ Errors in nuclide concentrations include propagated laboratory and measurement uncertainties. Measured ratios of <sup>10</sup>Be normalized to the new 07KNSTD3110 standard (Nishizumi, et al., 2007).

## IDs ending in "ave" are the average of the indicated process or temporal replicates.

Table DR-2. Soil profile from the Te Arai basin, SW Waipaoa Basin.

| Sample ID* | Collection Date | Type         | Basin   | Depth (cm) | $^{10}\text{Be}$ (at/g $\times 10^7$ )† | Percent Analytic Error ( $\pm$ ) |
|------------|-----------------|--------------|---------|------------|-----------------------------------------|----------------------------------|
| MJNZ5met   | March 2005      | Soil Profile | Te Arai | 10         | $10.81 \pm 0.29$                        | 2.7                              |
| MJNZ6met   | March 2005      | Soil Profile | Te Arai | 20         | $9.90 \pm 0.26$                         | 2.6                              |
| MJNZ7met   | March 2005      | Soil Profile | Te Arai | 40         | $5.65 \pm 0.14$                         | 2.5                              |
| MJNZ8met   | March 2005      | Soil Profile | Te Arai | 60         | $2.48 \pm 0.09$                         | 3.5                              |
| MJNZ9met   | March 2005      | Soil Profile | Te Arai | 80         | $2.28 \pm 0.06$                         | 2.8                              |
| MJNZ10met  | March 2005      | Soil Profile | Te Arai | 100        | $1.97 \pm 0.06$                         | 3.2                              |

\* All samples prepared at the Hebrew University in Jerusalem, Israel, and measured at CAMS, LLNL.

† Errors in nuclide concentrations include propagated laboratory and measurement uncertainties.

Measured ratios of  $10/9$  Be normalized to the new 07KNSTD3110 standard (Nishiizumi, et al., 2007).

**References Cited:**

- Nishiizumi, K., Imamura, M., Caffee, M., Southon, J., Finkel, R., and McAninch, J., 2007, Absolute calibration of  $^{10}\text{Be}$  AMS standards: Nuclear Instruments and Methods in Physics Research B, v. 258, p. 403-413.
- Stone, J., 1998, A rapid fusion method for separation of beryllium-10 from soils and silicates: *Geochemica et Cosmochemica Acta*, v. 62, p. 555-561.
- Waipaoa Catchment Study Project Team, 1994, Waipaoa Catchment Study: Literature Review, 122 p, Manaaki Whenua-Landcare Research, Palmerston North.
